# Supplementary material for: Environmental enrichment ameliorates perinatal brain injury and promotes functional white matter recovery
Source: PubMed Central journal article supplement (PMC7031237; doi:10.1038/s41467-020-14762-7), 2020-02-19
Supplement: 41467_2020_14762_MOESM1_ESM.pdf [file 41467_2020_14762_MOESM1_ESM.pdf]

Supplementary Information for:

**Environmental enrichment ameliorates perinatal brain injury and promotes functional white matter recovery**

Thomas A. Forbes<sup>1,2\*</sup>, Evan Z. Goldstein<sup>1\*</sup>, Jeffrey L. Dupree<sup>3</sup>, Beata Jablonska<sup>1,2</sup>, Joseph Scafidi<sup>1,2</sup>, Katrina L. Adams<sup>1</sup>, Yuka Imamura<sup>4</sup>, Kazue Hashimoto-Torii<sup>1</sup>, and Vittorio Gallo<sup>1,2,†</sup>

\* These authors contributed equally

†Correspondence to: [vgallo@cnmcresearch.org](mailto:vgallo@cnmcresearch.org) (V. Gallo).

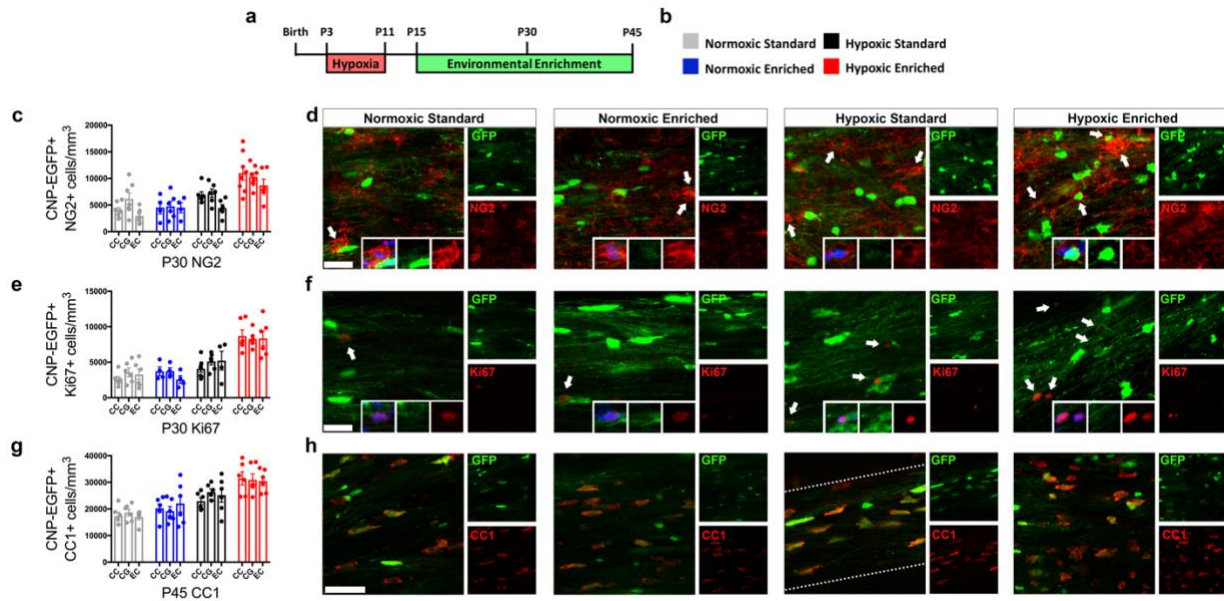

**Supplementary Figure 1. Region-specific breakdown and immunohistochemical labeling of OL lineage and proliferation markers from the subcortical WM of CNP-EGFP mice. (a)** Experimental paradigm. **(b)** Experimental groups. **(c)** WM region-specific quantification of EGFP+NG2+ OPCs at P30 (CC = corpus callosum, CG = cingulum, EC = external capsule) (NX,  $n = 7$ ; NX-EE,  $n = 6$ ; HX,  $n = 6$ ; HX-EE,  $n = 8$ ). **(d)** Representative images of EGFP- (green) and NG2- (red) expressing OPCs for all groups. Green fluorescence is much reduced in OPCs compared with OL. Arrows and insets are provided to assist in the identification of co-labeled cells (DAPI labeled in blue is included in inset images). Scale bar =  $30\mu\text{m}$ . **(e)** WM region-specific quantification of EGFP+Ki67+ proliferating OPCs at P30 (NX,  $n = 6$ ; NX-EE,  $n = 5$ ; HX,  $n = 7$ ; HX-EE,  $n = 6$ ). **(f)** Representative images of EGFP- (green) and Ki67- (red) expressing proliferating OPCs. Scale bar =  $30\mu\text{m}$ . **(g)** WM region-specific quantification of EGFP+CC1+ OLs at P45 ( $n = 6$  for all groups) **(h)** Representative images of EGFP- (green) and CC1- (red) expressing OLs. Scale bar =  $50\mu\text{m}$ . Dotted white lines illustrate the WM/GM border. Data expressed as mean  $\pm$  SEM. Source data are provided as a Source Data file.

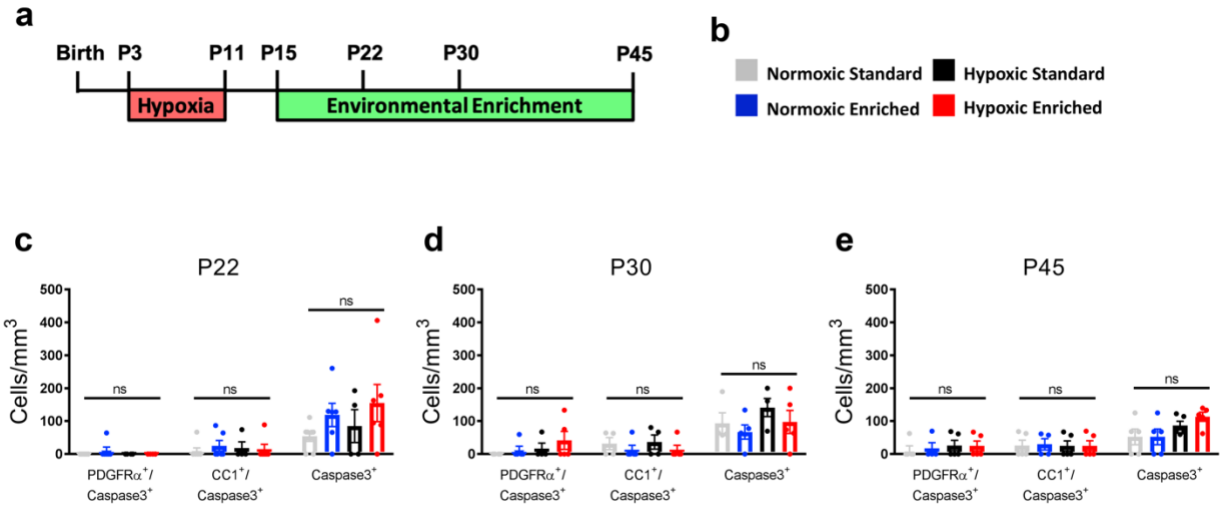

**Supplementary Figure 2. Environmental enrichment has no effect on caspase3-mediated apoptosis in the subcortical white matter.** (a) Experimental paradigm. (b) Experimental groups. (c-e) Quantification of PDGFR $\alpha^+$ Cleaved Caspase3<sup>+</sup>, CC1<sup>+</sup>Cleaved Caspase3<sup>+</sup>, or total Cleaved Caspase3<sup>+</sup> cells at P22 (NX,  $n=7$ ; NX-EE,  $n=6$ ; HX,  $n=4$ ; HX-EE,  $n=6$ ) (c), P30 (NX,  $n=4$ ; NX-EE,  $n=5$ ; HX,  $n=4$ ; HX-EE,  $n=5$ ) (d), and P45 (NX,  $n=5$ ; NX-EE,  $n=4$ ; HX,  $n=5$ ; HX-EE,  $n=5$ ) (e). Data expressed as mean  $\pm$  SEM. One-way ANOVA followed by a Tukey's post hoc test for multiple comparisons was used to compare differences between groups. Source data are provided as a Source Data file.

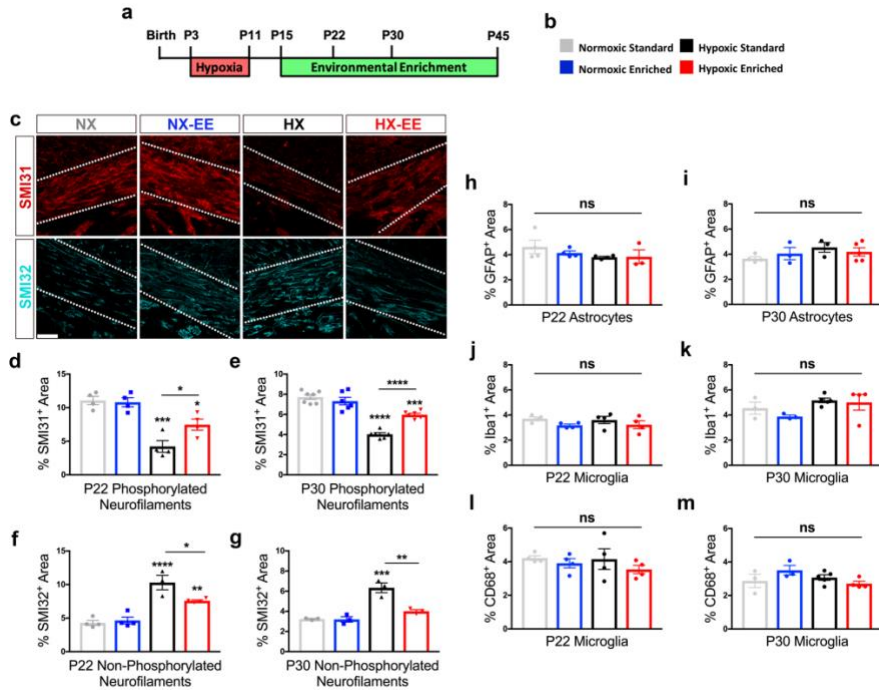

**Supplementary Figure 3. Other cell types involved in environmental enrichment-induced recovery from perinatal brain injury.** (a) Experimental paradigm. (b) Experimental groups. (c) Representative images of phosphorylated neurofilaments (SMI31, red) and non-phosphorylated neurofilaments (SMI32, blue) in the subcortical white matter for all groups. Dotted white lines illustrate the WM/GM border. Scale bar = 50 $\mu$ m. (d-e) Quantification of phosphorylated neurofilament immunofluorescence (% SMI31+ area) at P22 ( $n = 4$  per group) (\*\* $p = 0.0002$ , \* $p = 0.024$ , \* $p = 0.044$ ) (d) and P30 (NX,  $n = 7$ ; NX-EE,  $n = 6$ ; HX,  $n = 6$ ; HX-EE,  $n = 6$ ) (\*\*\*\* $p = 0.0002$ , \*\*\*\* $p < 0.0001$ ) (e). (f-g) Quantification of non-phosphorylated neurofilament immunofluorescence (% SMI32+ area) at P22 (NX,  $n = 4$ ; NX-EE,  $n = 4$ ; HX,  $n = 3$ ; HX-EE,  $n = 4$ ) (\*\*\*\* $p < 0.0001$ , \*\* $p = 0.004$ , \* $p = 0.025$ ) (f) and P30 ( $n = 3$  per group) (\*\*\* $p = 0.0003$ , \*\* $p = 0.002$ ) (g). (h-i) Quantification of astrocyte immunofluorescence (% GFAP+ area) at P22 (NX,  $n = 4$ ; NX-EE,  $n = 4$ ; HX,  $n = 4$ ; HX-EE,  $n = 3$ ) (h) and P30 (NX,  $n = 4$ ; NX-EE,  $n = 3$ ; HX,  $n = 3$ ; HX-EE,  $n = 5$ ) (i). (j-k) Quantification of microglia immunofluorescence (% IBA1+ area) at P22 ( $n = 4$  per group) (j) and P30 (NX,  $n = 3$ ; NX-EE,  $n = 3$ ; HX,  $n = 5$ ; HX-EE,  $n = 4$ ) (k). (l-m) Quantification of phagocytic microglia immunofluorescence (% CD68+ area) at P22 ( $n = 4$  per group) (l) and P30 (NX,  $n = 3$ ; NX-EE,  $n = 3$ ; HX,  $n = 5$ ; HX-EE,  $n = 4$ ) (m). Data expressed as mean  $\pm$  SEM. One-way ANOVA followed by a Tukey's post hoc test for multiple comparisons was used to compare differences between groups. Source data are provided as a Source Data file.

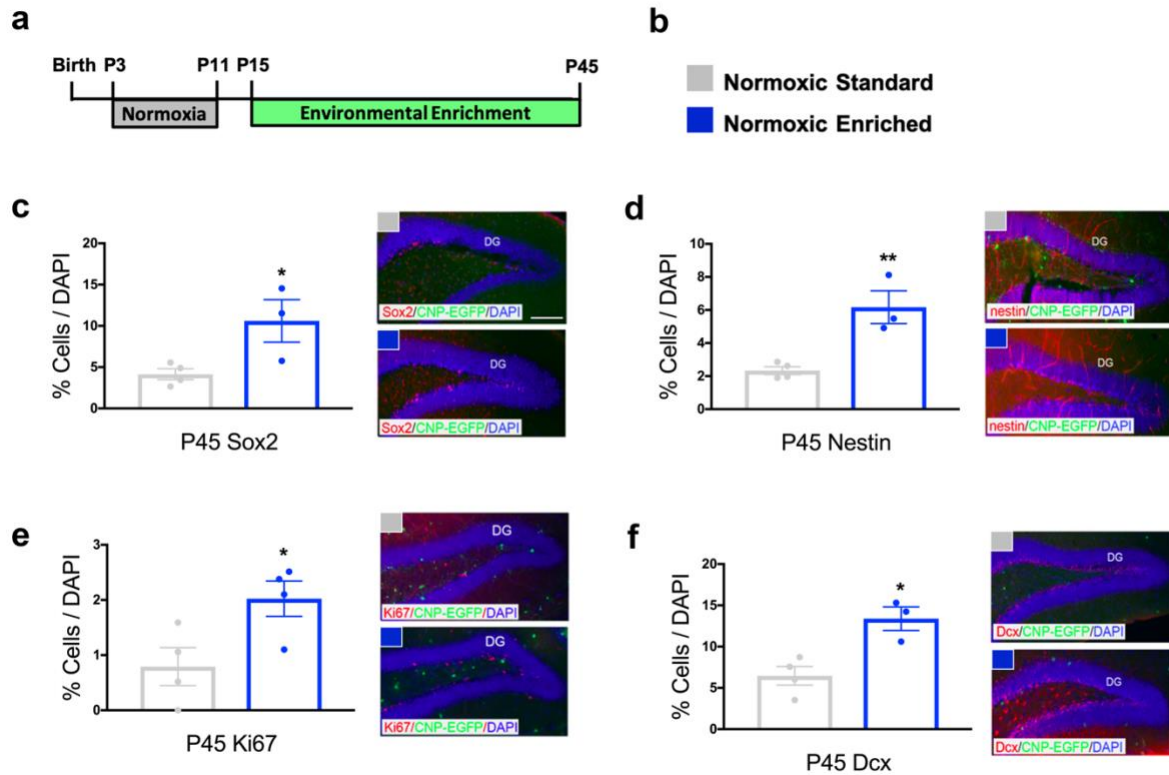

**Supplementary Figure 4. Environmental enrichment promotes hippocampal stem cell proliferation and neurogenesis under normal physiological conditions (NX).** (a) Experimental paradigm. (b) Experimental groups. (c-f) Quantification of Sox2<sup>+</sup> cells (NX,  $n = 4$ ; NX-EE,  $n = 3$ ; \*  $p = 0.03$ ) (c), Nestin<sup>+</sup> cells (NX,  $n = 4$ ; NX-EE,  $n = 3$ ; \*\*  $p = 0.007$ ). Scale bar = 100 $\mu$ m. (d), Ki67<sup>+</sup> cells (NX,  $n = 4$ ; NX-EE,  $n = 4$ ; \*  $p = 0.03$ ) (e), and Dcx<sup>+</sup> cells (NX,  $n = 4$ ; NX-EE,  $n = 3$ ; \*  $p = 0.01$ ) (f) in the dentate gyrus of the hippocampus at P45. Representative images for each cell population are shown. Data are expressed as the mean  $\pm$  SEM percentage of cells per total DAPI labeled cells. A two-tailed, unpaired t-test was used to compare differences for each marker. Source data are provided as a Source Data file.

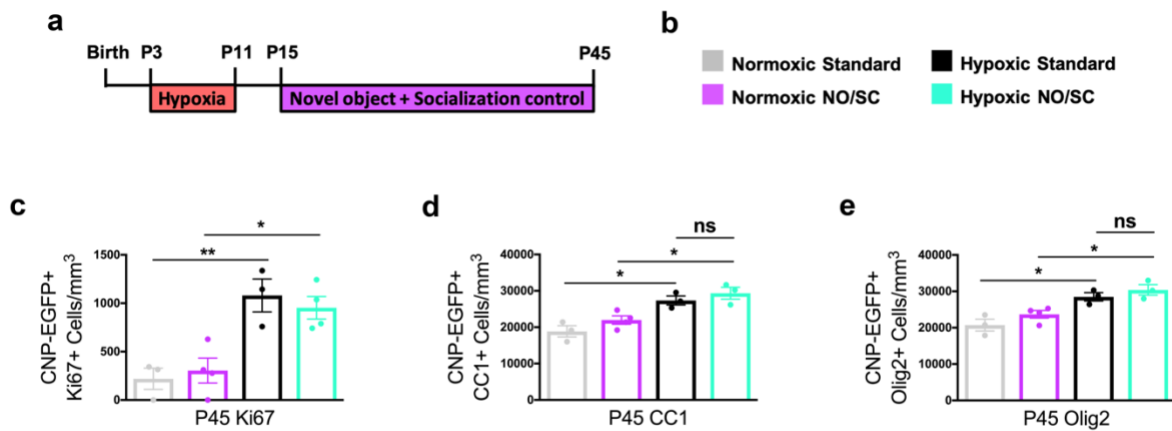

**Supplementary Figure 5. Novel object exposure and increased socialization has no effect on OL recovery after perinatal brain injury. (a)** Experimental paradigm. Mice were placed in large social groups and exposed to novel objects, without access to a running wheel. **(b)** Experimental groups (NX, NX Novel Object and Socialization Control (NX-NO/SC), HX, HX Novel Object and Socialization Control (HX-NO/SC)). **(c)** Quantification of EGFP+Ki67+ cells at P45 (\*  $p = 0.017$ ; \*\*  $p = 0.007$ ) (NX,  $n = 3$ ; NX-NO/SC,  $n = 4$ ; HX,  $n = 3$ ; HX NO/SC,  $n = 4$ ). **(d)** Quantification of EGFP+CC1+ OLs at P45 (From left to right: \*  $p = 0.011$ , \*  $p = 0.016$ , ns = not significant) (NX,  $n = 3$ ; NX-NO/SC,  $n = 4$ ; HX,  $n = 3$ ; HX-NO/SC,  $n = 3$ ). **(e)** Quantification of EGFP+Olig2+ cells at P45 (From left to right: \*  $p = 0.012$ , \*  $p = 0.019$ ) (NX,  $n = 3$ ; NX-NO/SC,  $n = 4$ ; HX,  $n = 3$ ; HX-NO/SC,  $n = 3$ ). Data expressed as mean  $\pm$  SEM. One-way ANOVA followed by a Tukey's post hoc test for multiple comparisons was used to compare differences between groups. Source data are provided as a Source Data file.

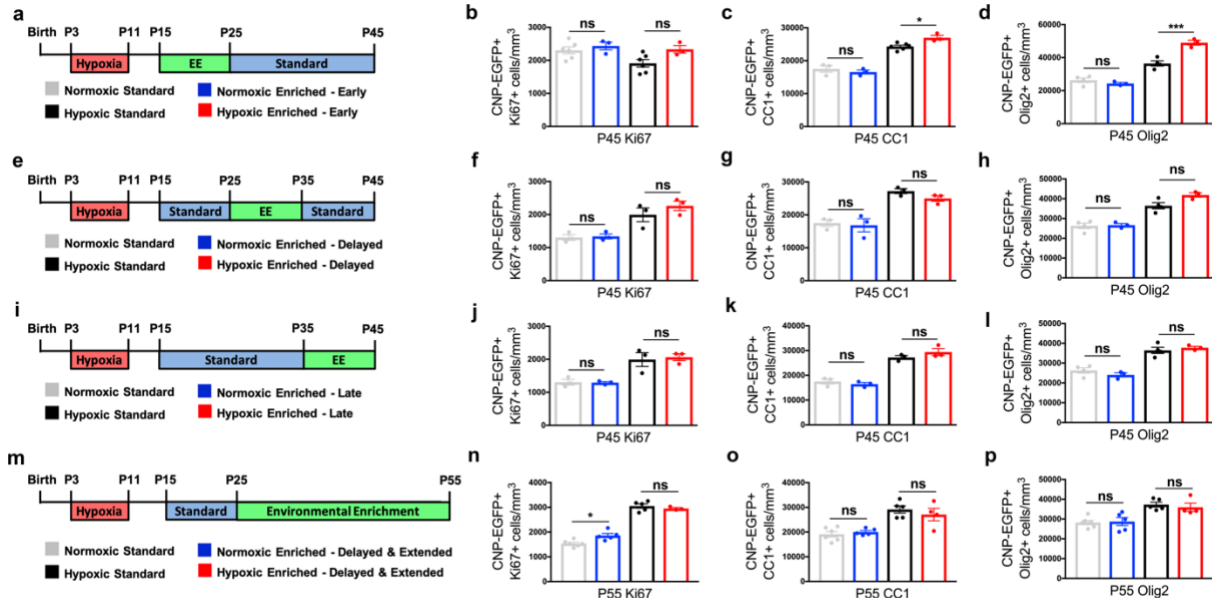

**Supplementary Figure 6. Alternative paradigms of non-continuous environmental enrichment did not improve WM recovery after perinatal brain injury.** (a) Early intervention paradigm exposed mice to EE from P15-P25 only. (b) Quantification of EGFP+Ki67+ OPCs at P45 following early EE (NX,  $n = 6$ ; NX-EE,  $n = 3$ ; HX,  $n = 6$ ; HX-EE,  $n = 3$ ). (c) EGFP+CC1+ OLS at P45 following early EE (NX,  $n = 3$ ; NX-EE,  $n = 3$ ; HX,  $n = 6$ ; HX-EE,  $n = 3$ ) (\*  $p = 0.04$ ). (d) EGFP+Olig2+ cells following early EE (NX,  $n = 4$ ; NX-EE,  $n = 3$ ; HX,  $n = 4$ ; HX-EE,  $n = 3$ ) (\*\* $p = 0.0004$ ). (e) Delayed intervention paradigm: mice were exposed to EE from P25-P35. (f) Quantification of EGFP+Ki67+ OPCs following delayed EE ( $n = 3$  per group). (g) EGFP+CC1+ OLS following delayed EE ( $n = 3$  per group). (h) EGFP+Olig2+ cells at P45 following delayed EE (NX,  $n = 4$  animals; NX-EE,  $n = 3$  animals; HX,  $n = 4$  animals; HX-EE,  $n = 3$  animals). (i) Late intervention paradigm exposed mice to EE from P35 to P45. (j) Quantification of EGFP+Ki67+ OPCs following late EE ( $n = 3$  per group). (k) EGFP+CC1+ OLS following late EE ( $n = 3$  per group). (l) EGFP+Olig2+ cells at P45 following late EE ( $n = 3$  per group). (m) Delayed and extended intervention paradigm exposed mice to EE from P25-P55. (n) Quantification of EGFP+Ki67+ OPCs at P45 following early EE (NX,  $n = 6$ ; NX-EE,  $n = 5$ ; HX,  $n = 5$ ; HX-EE,  $n = 3$ ) (\*  $p = 0.02$ ). (o) EGFP+CC1+ OLS at P45 following early EE (NX,  $n = 6$ ; NX-EE,  $n = 5$ ; HX,  $n = 5$ ; HX-EE,  $n = 4$ ). (p) EGFP+Olig2+ cells following early EE (NX,  $n = 6$ ; NX-EE,  $n = 5$ ; HX,  $n = 5$ ; HX-EE,  $n = 4$ ). Data expressed as mean  $\pm$  SEM. One-way ANOVA followed by a Tukey's post hoc test for multiple comparisons was used to compare differences between groups. Source data are provided as a Source Data file.



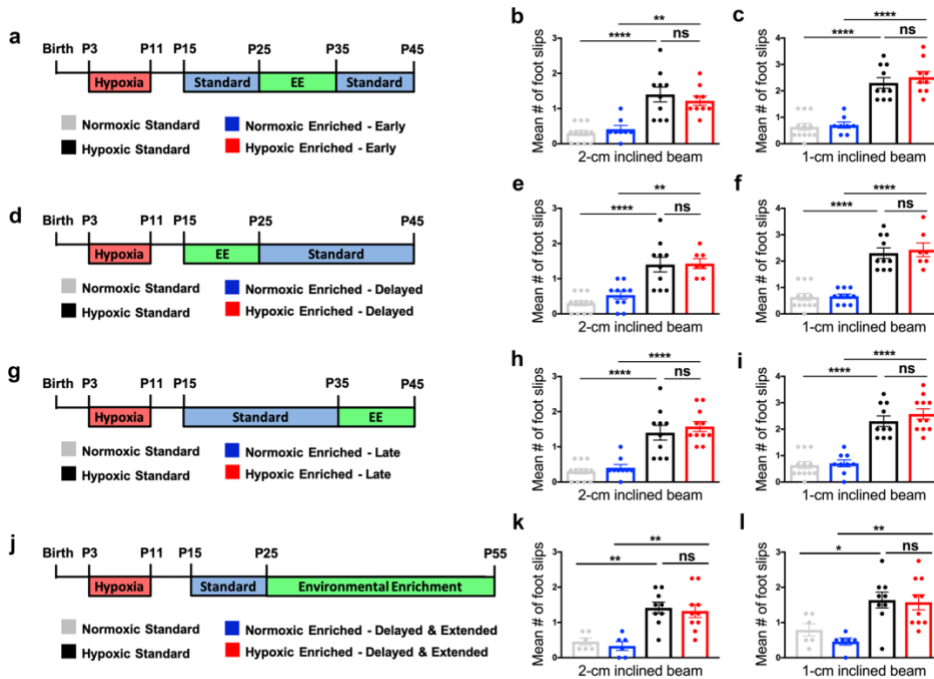

**Supplementary Figure 7. Number of foot slips on inclined beam task for alternative paradigms of environmental enrichment.** (a) Early intervention paradigm exposed mice to EE from P15-P25 only. (b-c) Quantification of foot slips on 2-cm inclined beam (\*\*\*\*  $p < 0.0001$ , \*\*  $p = 0.003$ ) (b) and 1-cm inclined beam (\*\*\*\*  $p < 0.0001$ ) (c) at P45 following early EE (NX,  $n = 12$ ; NX-EE,  $n = 8$ ; HX,  $n = 10$ ; HX-EE,  $n = 9$ ). (d) Delayed intervention paradigm: mice were exposed to EE from P25-P35. (e-f) Quantification of foot slips on 2-cm inclined beam (\*\*\*\*  $p < 0.0001$ , \*\*  $p = 0.001$ ) (e) and 1-cm inclined beam (\*\*\*\*  $p < 0.0001$ ) (f) at P45 following delayed EE (NX,  $n = 12$ ; NX-EE,  $n = 10$ ; HX,  $n = 10$ ; HX-EE,  $n = 7$ ). (g) Late intervention paradigm exposed mice to EE from P35 to P45. (h-i) Quantification of foot slips on 2-cm inclined beam (\*\*\*\*  $p < 0.0001$ ) (h) and 1-cm inclined beam (\*\*\*\*  $p < 0.0001$ ) (i) at P45 following late EE (NX,  $n = 12$ ; NX-EE,  $n = 9$ ; HX,  $n = 10$ ; HX-EE,  $n = 11$ ). (j) Delayed and extended intervention paradigm exposed mice to EE from P25-P55. (k-l) Quantification of foot slips on 2-cm inclined beam (From left to right: \*\*  $p = 0.003$ , \*\*  $p = 0.001$ ) (k) and 1-cm inclined beam (\*  $p = 0.05$ , \*\*  $p = 0.005$ ) (l) at P45 following early EE (NX,  $n = 6$ ; NX-EE,  $n = 6$ ; HX,  $n = 9$ ; HX-EE,  $n = 10$ ). Data expressed as mean  $\pm$  SEM. One-way ANOVA followed by a Tukey's post hoc test for multiple comparisons was used to compare differences between groups. Source data are provided as a Source Data file.



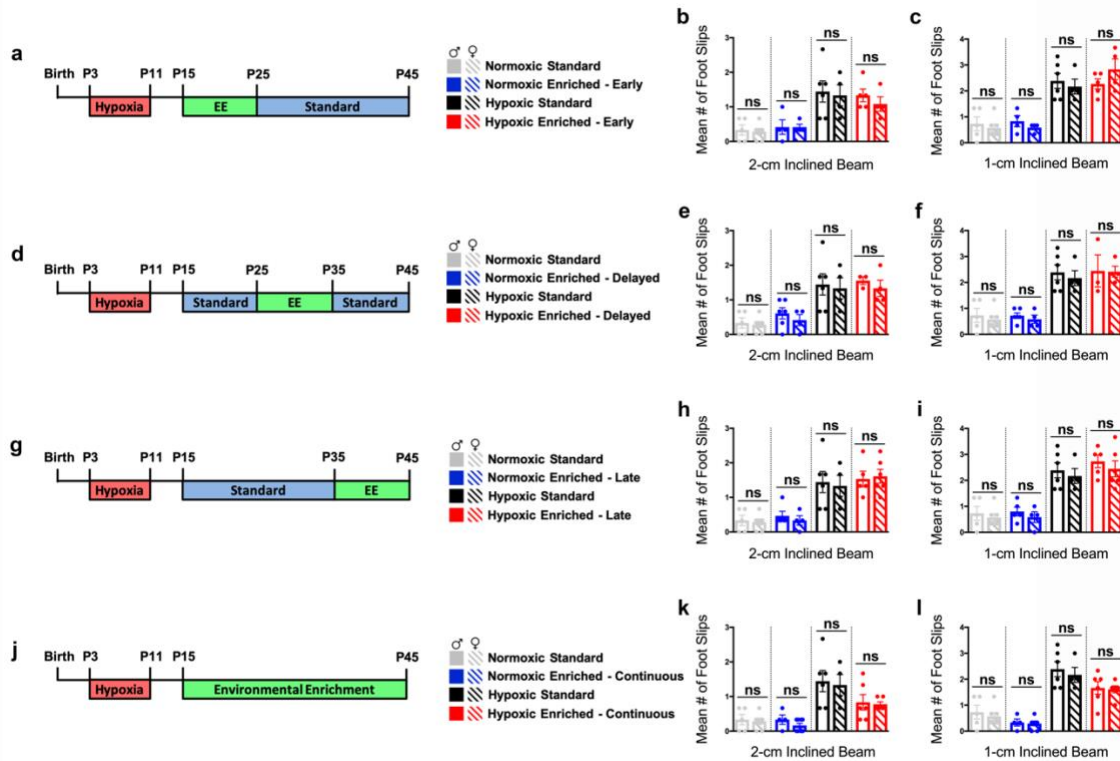

**Supplementary Figure 8. Sex comparison of inclined beam task for alternative paradigms of environmental enrichment. (a)** Early EE intervention paradigm. **(b-c)** Quantification of foot slips on 2-cm inclined beam **(b)** and 1-cm inclined beam **(c)** following early EE, with males and females analyzed separately (NX,  $n = 12$  (7 females, 5 males); NX-EE,  $n = 8$  (4 females, 4 males); HX,  $n = 10$  (4 females, 6 males); HX-EE,  $n = 9$  (4 females, 5 males)). **(d)** Delayed EE intervention paradigm. **(e-f)** Quantification of foot slips on 2-cm inclined beam **(e)** and 1-cm inclined beam **(f)** following delayed EE, with males and females analyzed separately (NX,  $n = 12$  (7 females, 5 males); NX-EE,  $n = 10$  (4 females, 6 males); HX,  $n = 10$  (4 females, 6 males); HX-EE,  $n = 7$  (4 females, 3 males)). **(g)** Late EE intervention paradigm. **(h-i)** Quantification of foot slips on 2-cm inclined beam **(h)** and 1-cm inclined beam **(i)** following late EE, with males and females analyzed separately (NX,  $n = 12$  (7 females, 5 males); NX-EE,  $n = 9$  (4 females, 5 males); HX,  $n = 10$  (4 females, 6 males); HX-EE,  $n = 11$  (6 females, 5 males)). **(j)** Continuous EE intervention paradigm. **(k-l)** Quantification of foot slips on 2-cm inclined beam **(k)** and 1-cm inclined beam **(l)** following continuous EE, with males and females analyzed separately (NX,  $n = 12$  (7 females, 5 males); NX-EE,  $n = 12$  (8 females, 4 males); HX,  $n = 10$  (4 females, 6 males); HX-EE,  $n = 12$  (6 females, 6 males)). Data expressed as mean  $\pm$  SEM. One-way ANOVA followed by a Tukey's post hoc test for multiple comparisons was used to compare differences between groups. Source data are provided as a Source Data file.

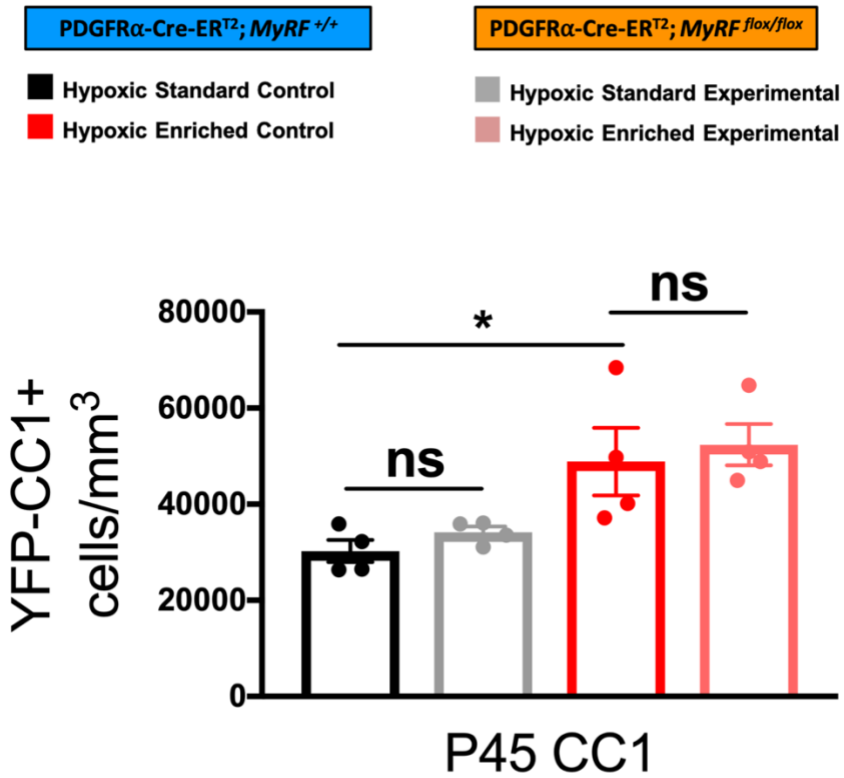

**Supplementary Figure 9. Quantification of total YFP(-) CC1(+) OLs at P45.**  $n = 4$  mice per group. \*  $p = 0.044$ ; ns = not significant. Data expressed as mean  $\pm$  SEM. One-way ANOVA followed by a Tukey's post hoc test for multiple comparisons was used to compare differences between groups. Source data are provided as a Source Data file.

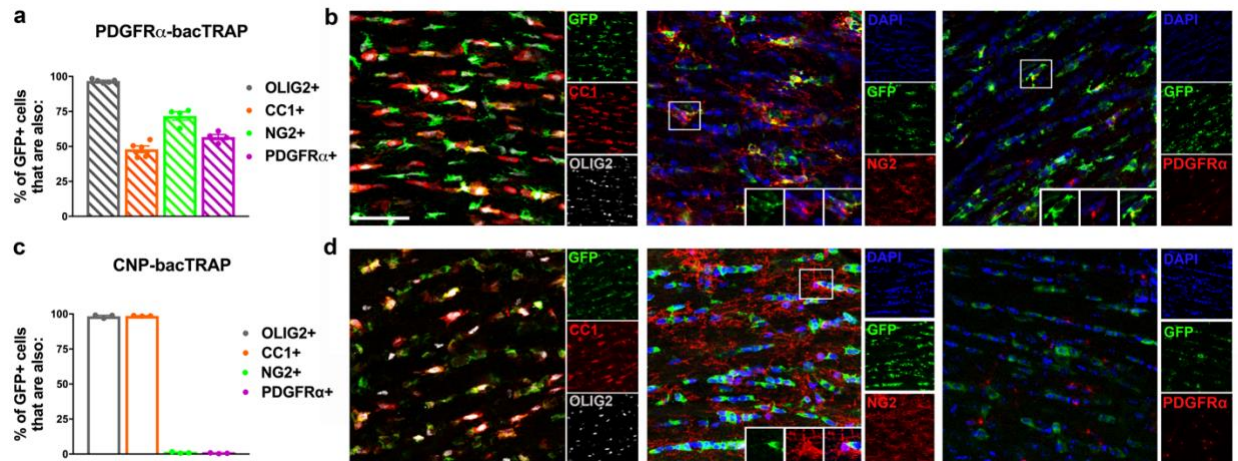

**Supplementary Figure 10. Characterization of oligodendrocyte lineage cells in PDGFR $\alpha$ -bacTRAP and CNP-bacTRAP mice.** (a) Characterization of *PDGFR $\alpha$ -bacTRAP* mouse subcortical white matter. Data represent the mean  $\pm$  SEM of GFP-expressing cells that also express: Olig2 (OL-lineage cells;  $n = 5$ ), CC1 (OLs;  $n = 5$ ), NG2 (OPCs;  $n = 4$ ), or PDGFR $\alpha$  (OPCs;  $n = 4$ ). (b) Representative images of corpus callosum from *PDGFR $\alpha$ -bacTRAP* mice immunohistochemically labeled for: GFP (PDGFR $\alpha$ +OPC ribosomes; green), CC1 (red), and Olig2 (white), DAPI (nuclei; blue), GFP (green), and NG2 (red), or DAPI (nuclei; blue), GFP (green), and PDGFR $\alpha$  (red). Inset images show a magnified view of GFP colocalization with NG2 or PDGFR $\alpha$ -expressing cells. Immunohistochemical labeling was performed once using established protocols. (c) Characterization of *CNP-bacTRAP* mouse subcortical white matter. Data represent the mean  $\pm$  SEM of GFP-expressing cells that also express: OLIG2 (OL-lineage cells), CC1 (OLs), NG2 (OPCs), or PDGFR $\alpha$  (OPCs;  $n = 3$  mice). (d) Representative images of corpus callosum from *CNP-bacTRAP* mice immunohistochemically labeled for: GFP (CNP+ oligodendrocyte ribosomes; green), CC1 (red), and OLIG2 (white), DAPI (nuclei; blue), GFP (green), and NG2 (red), or DAPI (nuclei; blue), GFP (green), and PDGFR $\alpha$  (red). Inset images show a magnified view of an NG2-expressing cell, juxtaposed to (but not co-localized to) a GFP-expressing cell. Immunohistochemical labeling was performed once using established protocols. Scale bar = 50 $\mu$ m. Source data are provided as a Source Data file.

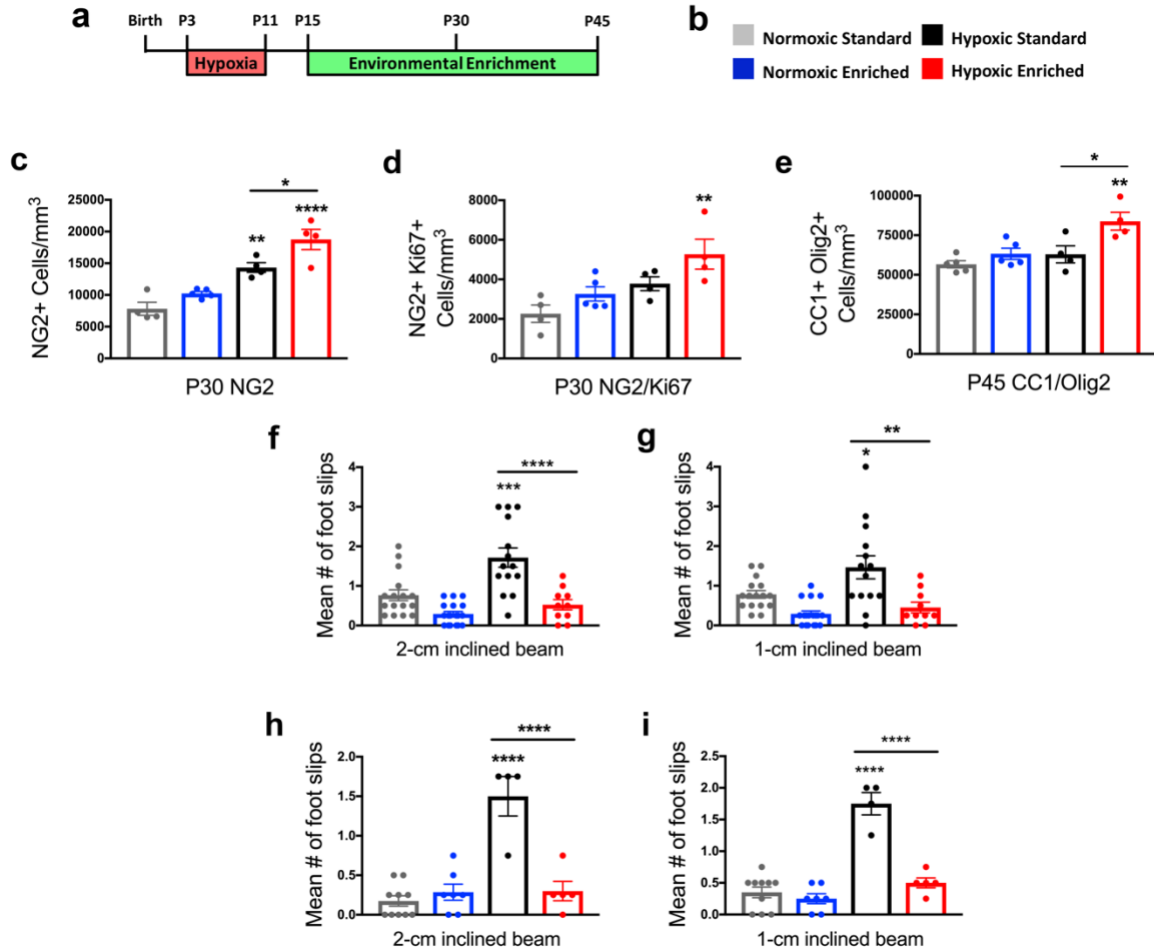

**Supplementary Figure 11. Replication of major findings in CNP-bacTRAP and PDGFR $\alpha$ -bacTRAP mice.** (a) Experimental paradigm. *CNP-bacTRAP* and *PDGFR $\alpha$ -bacTRAP* mice were exposed to hypoxic conditions (HX) from postnatal day 3 (P3) to P11, followed by environmental enrichment (EE) from P15 to P45. Mice were sacrificed for analysis at P30 and P45. (b) Experimental groups. (c) Quantification of NG2+ OPCs at P30 in *CNP-bacTRAP* mice (\*  $p = 0.04$ , \*\*  $p = 0.003$ , \*\*\*\*  $p < 0.0001$ ) (NX,  $n = 4$ ; NX-EE,  $n = 5$ ; HX,  $n = 4$ ; HX-EE,  $n = 4$ ). (d) Quantification of NG2+Ki67+ proliferating OPCs at P30 in *CNP-bacTRAP* mice (\*\*  $p = 0.005$ ) (NX,  $n = 4$ ; NX-EE,  $n = 5$ ; HX,  $n = 4$ ; HX-EE,  $n = 4$ ). (e) Quantification of CC1+OLIG2+ OLs at P45 in *CNP-bacTRAP* mice (\*  $p = 0.02$ , \*\*  $p = 0.002$ ) (NX,  $n = 5$ ; NX-EE,  $n = 5$ ; HX,  $n = 4$ ; HX-EE,  $n = 4$ ). (f-g) Quantification of foot slips in *CNP-bacTRAP* mice for 2-cm beam (\*\*\*)  $p = 0.0002$ , \*\*\*\*  $p < 0.0001$  (f), and 1-cm beam (\*  $p = 0.02$ , \*\*  $p = 0.001$ ) (g) at P45 (NX,  $n = 16$ ; NX-EE,  $n = 18$ ; HX,  $n = 14$ ; HX-EE,  $n = 10$ ). (h-i) Quantification of foot slips in *PDGFR $\alpha$ -bacTRAP* for 2-cm beam (h), and 1-cm beam (i) at P45 (\*\*\*\*  $p < 0.0001$ ) (NX,  $n = 10$ ; NX-EE,  $n = 7$ ; HX,  $n = 4$ ; HX-EE,  $n = 5$ ). Data expressed as mean  $\pm$  SEM. One-way ANOVA followed by a Tukey's post hoc test for

multiple comparisons was used to compare differences between groups. Source data are provided as a Source Data file.
